# Supplementary material for: Non-insulin determinant pathways maintain glucose homeostasis upon metabolic surgery
Source: PubMed Central journal article supplement (PMC6155125; doi:10.1038/s41421-018-0062-x), 2018-09-25
Supplement: 41421_2018_62_MOESM1_ESM.pdf [file 41421_2018_62_MOESM1_ESM.pdf]

### Supplementary Figure S1

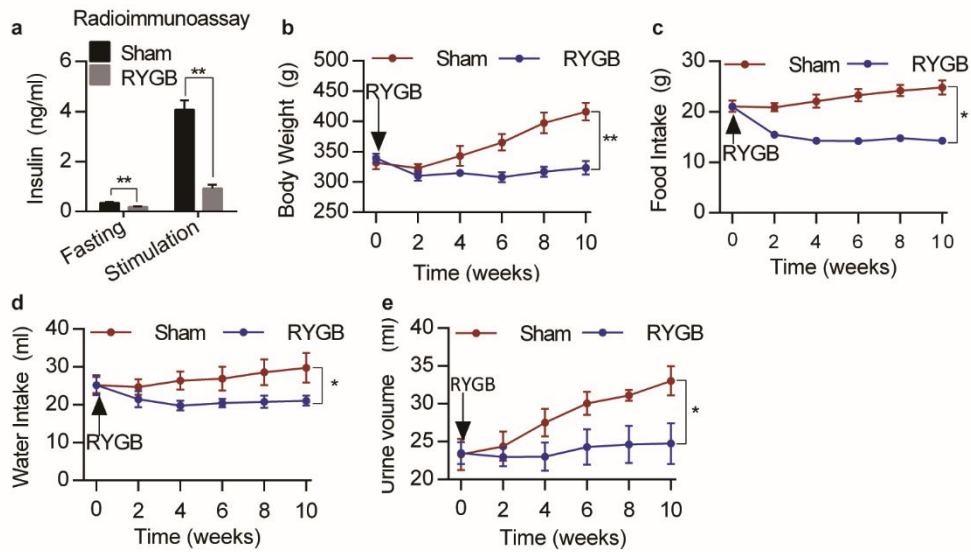

### Supplementary Figure S1. Effect of RYGB on physiological parameters in rats.

(a) Plasma insulin levels measured by radioimmunoassay in the fasting and glucose-stimulated states are significantly decreased in RYGB rats (n=10). (b-e) Body weight (b), food intake (c), water intake (d) and urine volume (e) of sham and RYGB rats (n=6-8). Values are shown as the mean  $\pm$  s.e.m. Significance was calculated using two-way ANOVA with Tukey's post hoc analysis (a) and repeated-measures analysis (b-e). \* $P$ <0.05 and \*\* $P$ <0.01 compared with the sham group.

### Supplementary Figure S2

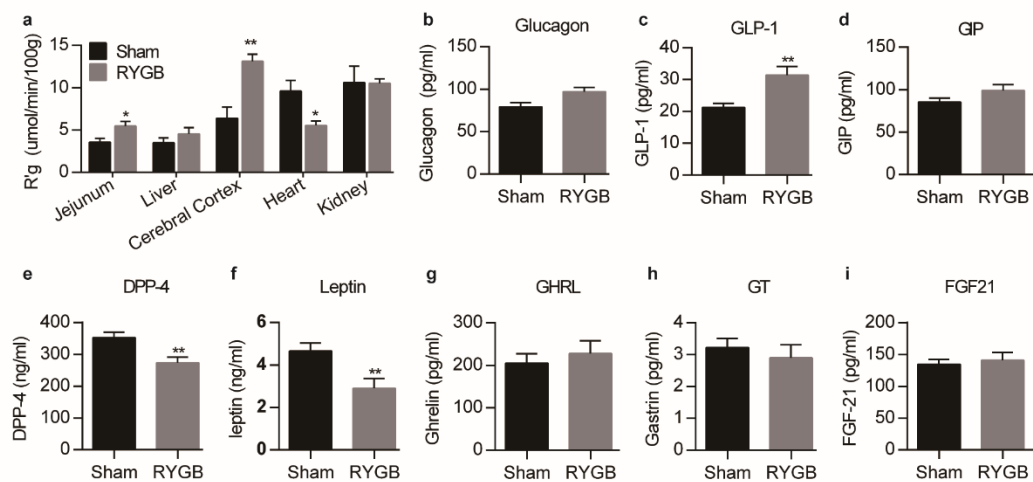

**Supplementary Figure S2.** Changes in gastrointestinal hormones and adipokines in plasma after RYGB. **(a)** Utilization of glucose in jejunum, liver, cerebral cortex, heart and kidney under hyperinsulinemic-euglycemic clamping homeostasis (n=4). **(b-i)** Plasma levels of gastrointestinal hormones and adipokines (glucagon, GLP-1, GIP, DPP-4, leptin, ghrelin, gastrin and FGF-21) in sham and RYGB rats (n=6-11). Values are shown as the mean  $\pm$  s.e.m. Significance was calculated using two-way ANOVA with Tukey's post hoc analysis (a) and two-tailed unpaired t-test (b-i). \* $P$ <0.05 and \*\* $P$ <0.01 compared with the sham group.

### Supplementary Figure S3

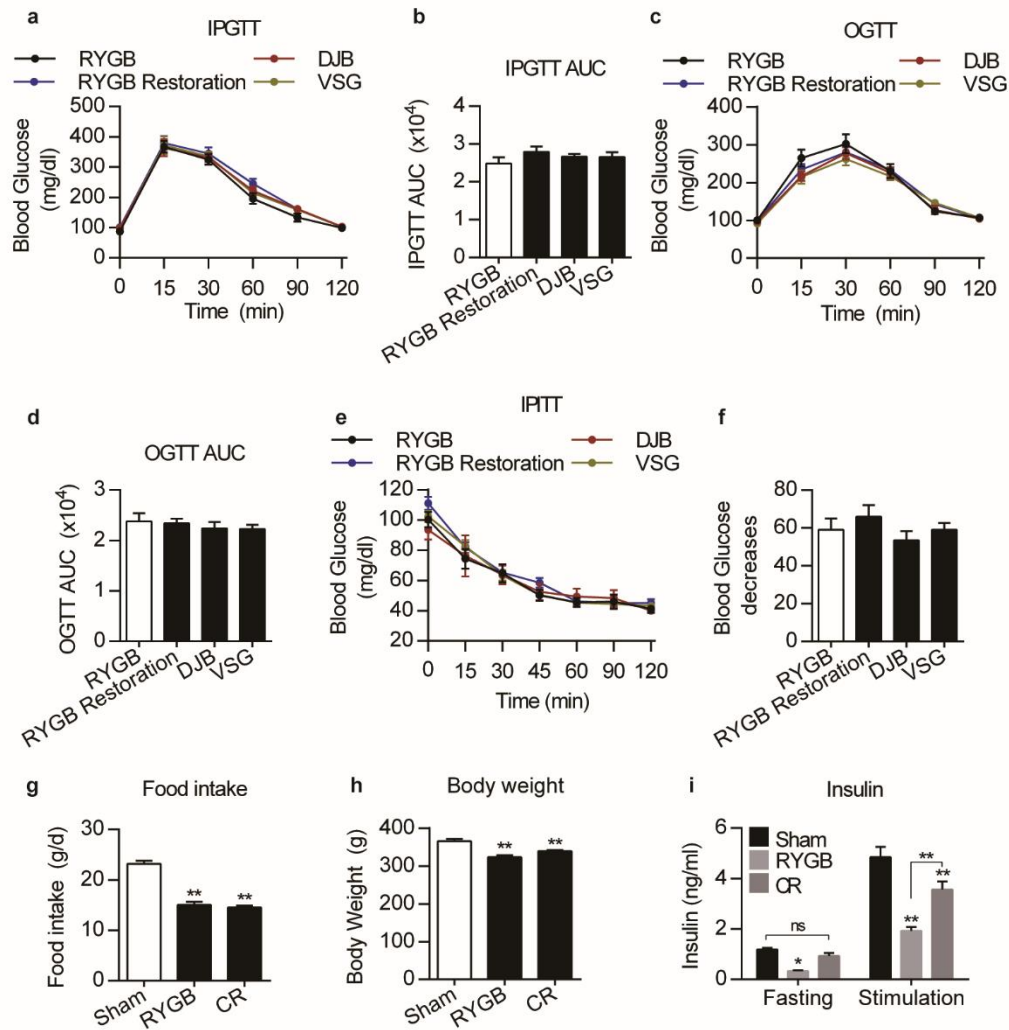

**Supplementary Figure S3.** Glucose and insulin tolerance tests in rats after different metabolic surgeries. **(a-f)** IPGTT (2g/kg) **(a-b)**, OGTT(2g/kg) **(c-d)** and IPITT **(e-f)** results in rats that underwent RYGB, DJB, VSG or RYGB restoration surgery. **(g-h)** Food intake, body weight and plasma insulin level in rats that treated with sham, RYGB or caloric restriction (CR). Values are shown as the mean  $\pm$  s.e.m. Significance was calculated using two-way ANOVA with Tukey's post hoc analysis (b, d, f, i) and one-way ANOVA with Tukey's post hoc analysis (g, h). \* $P < 0.05$  and \*\* $P < 0.01$  compared with the sham group.

## Supplementary Figure S4

**a**

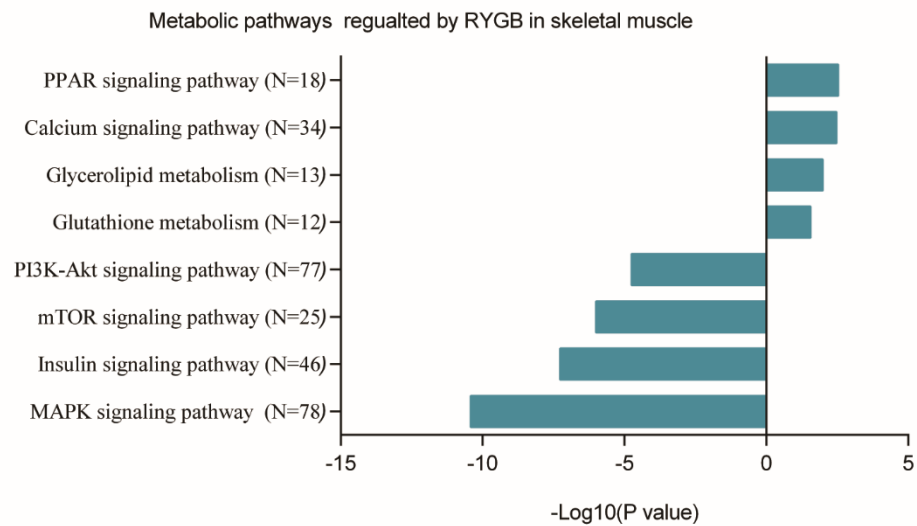

**b**

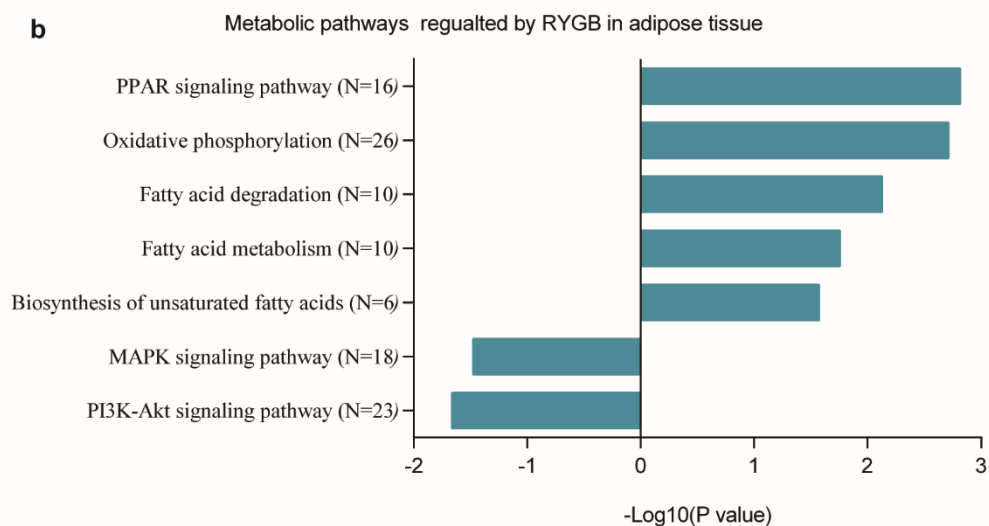

**Supplementary Figure S4.** Metabolic pathways in rat skeletal muscle and adipose tissue. **(a)** Enriched metabolic pathways in rat skeletal muscle regulated by RYGB (n=3). **(b)** Enriched metabolic pathways in rat adipose tissue regulated by RYGB (n=3).

Supplementary Figure S5

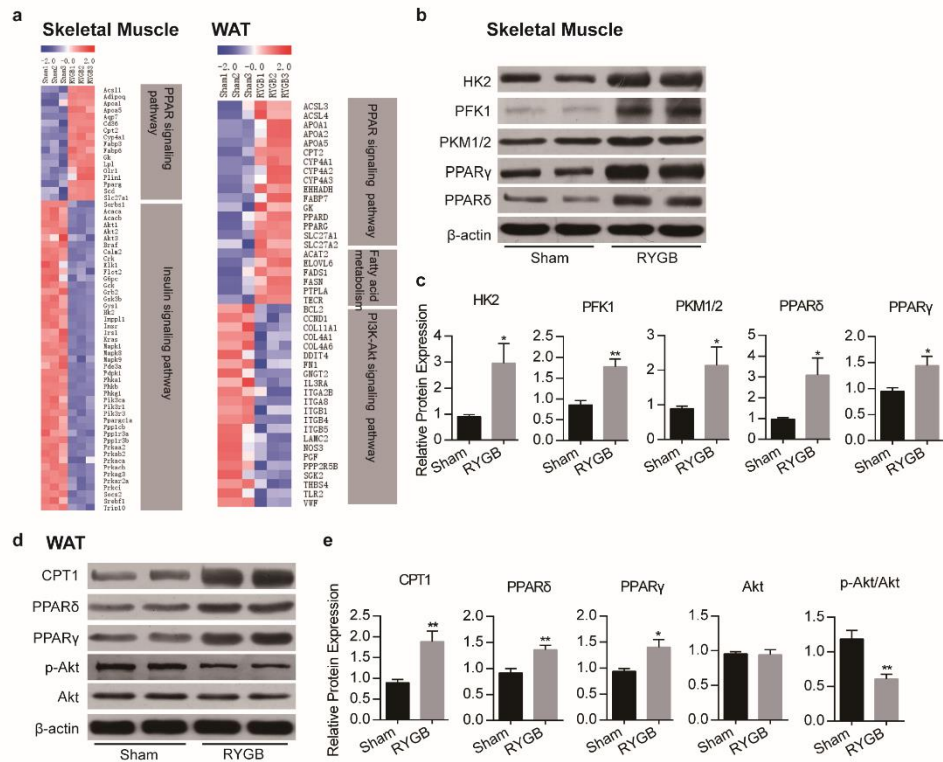

**Supplementary Figure S5.** Heatmap and related protein expression in skeletal muscle and WAT after surgery. **(a)** Expression levels of enriched metabolism pathway genes in skeletal muscle and WAT from sham and RYGB rats. **(b-c)** Immunoblots of HK2, PFK1, PKM1/2, PPAR $\gamma$  and PPAR $\delta$  and  $\beta$ -actin in skeletal muscle from sham and RYGB rats (n=6). **(d-e)** Immunoblots of CPT1, PPAR $\gamma$ , PPAR $\delta$ , p-Akt and Akt and  $\beta$ -actin in WAT from sham and RYGB rats (n=6). Values are shown as the mean  $\pm$  s.e.m. Significance was calculated using a two-tailed unpaired t-test (c, e). \* $P < 0.05$  and \*\* $P < 0.01$  compared with the sham group.

### Supplementary Figure S6

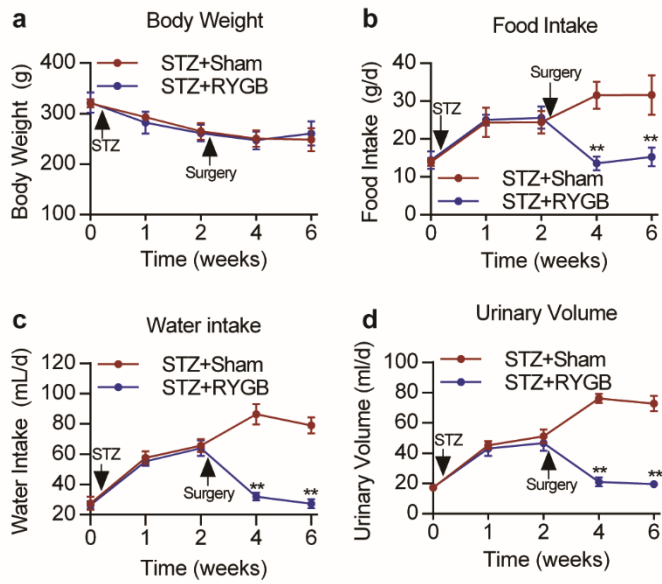

**Supplementary Figure S6. Effect of RYGB on rats with islet disruption. (a-d)**

Body weight **(a)**, food intake **(b)**, water intake **(c)** and urine volume **(d)** of sham- or RYGB-treated STZ injected rats (n=6-8). Values are shown as the mean  $\pm$  s.e.m. Significance was calculated using repeated-measures analysis (a-d).

\* $P < 0.05$  and \*\* $P < 0.01$  compared with the sham group.

## Supplementary Tables

**Table S1**

Baseline characteristics of patients with type 2 diabetes underwent metabolic surgery

|                          | Pre-RYGB<br>(n=87) | Post-RYGB | <i>p</i> value |
|--------------------------|--------------------|-----------|----------------|
| Age (years)              | 42±11              | —         | —              |
| Gender (male/female)     | 49/38              | —         | —              |
| Duration(year)           | 5±4                | —         | —              |
| BMI (kg/m <sup>2</sup> ) | 30.8±2.3           | 23.4±1.2  | 0.00           |
| WC (cm)                  | 99.9±2.5           | 80.6±4.2  | 0.00           |
| FBG (mmol/L)             | 8.1±0.6            | 6.2±0.8   | 0.00           |
| HbA1c (%)                | 7.9±0.8            | 6.2±0.6   | 0.00           |
| Fasting insulin (mIU/L)  | 20.1±2.5           | 12.4±1.6  | 0.01           |
| SBP (mm Hg)              | 132±11             | 122±13    | 0.00           |
| DBP (mm Hg)              | 80±11              | 72±10     | 0.00           |
| Cholesterol (mmol/l)     | 4.99±0.25          | 4.12±0.21 | 0.00           |
| Triglyceride (mmol/l)    | 3.06±0.24          | 1.34±0.17 | 0.00           |
| HDL-C (mmol/l)           | 1.28±0.03          | 1.21±0.05 | 0.54           |
| LDL-C (mmol/l)           | 2.70±0.06          | 2.42±0.07 | 0.89           |

The results are mean ± s.e.m. *p* values are obtained by paired two-tailed Student's *t* test. BMI, body mass index; FBG, fasting blood glucose; WC, waist circumference; SBP, systolic blood pressure; DBP, diastolic blood pressure.
